# Supplementary material
Source: ML conference proceedings conference paper supplement (https://openreview.net/forum?id=Dk4LyZ654W)
Supplement: supplementary_material [file attachment]

# Supplementary Materials: Future Motion Dynamic Modeling via Hybrid Supervision for Multi-Person Motion Prediction Uncertainty Reduction

## A PREDICTION RESULTS ON MI-MOTION DATASETS

In our study, we perform a series of experiments on the MI-Motion dataset at multiple time points. Specifically, we utilize 25 frames (equivalent to 1.0 second) as input to predict the subsequent 25 frames (also 1.0 second). Tables 1 and 2 respectively present the experimental results of our model and other methods at 0.08s ~ 0.4s and 0.56s ~ 1.0s. It can be observed that our method overall outperforms other methods in terms of the three metrics JPE, APE, and FDE.

**Table 1: Short-term prediction (0.08s ~ 0.4s) performance on MI-Motion dataset for 5 different scenes. Best results are shown in boldface.**

|                | Park     |           |           |           | Street   |           |           |           | Indoor    |           |           |           | Special Locations |           |            |            | Complex Crowd |           |           |           |
|----------------|----------|-----------|-----------|-----------|----------|-----------|-----------|-----------|-----------|-----------|-----------|-----------|-------------------|-----------|------------|------------|---------------|-----------|-----------|-----------|
| Time(s)        | 0.08     | 0.16      | 0.32      | 0.4       | 0.08     | 0.16      | 0.32      | 0.4       | 0.08      | 0.16      | 0.32      | 0.4       | 0.08              | 0.16      | 0.32       | 0.4        | 0.08          | 0.16      | 0.32      | 0.4       |
| JPE            |          |           |           |           |          |           |           |           |           |           |           |           |                   |           |            |            |               |           |           |           |
| MRT [3]        | 23       | 44        | 76        | 88        | 20       | 39        | 74        | 89        | 25        | 50        | 80        | 101       | 47                | 90        | 159        | 189        | 24            | 47        | 88        | 106       |
| TBFormer [1]   | 21       | 36        | 64        | 75        | 20       | 33        | 60        | 74        | 20        | 37        | 69        | 84        | 35                | 80        | 158        | 189        | 18            | 32        | 63        | 78        |
| SocialTGCN [2] | 18       | 34        | 60        | 72        | 15       | 28        | 54        | 64        | 20        | 37        | 67        | 81        | 45                | 89        | 165        | 199        | 20            | 37        | 70        | 85        |
| JRFormer [4]   | <b>8</b> | <b>19</b> | 47        | 60        | <b>9</b> | 23        | 57        | 71        | 17        | 39        | 75        | 87        | <b>30</b>         | 86        | 191        | 229        | 14            | 25        | 56        | 71        |
| Ours           | 10       | 21        | <b>43</b> | <b>53</b> | <b>9</b> | <b>17</b> | <b>38</b> | <b>48</b> | <b>11</b> | <b>24</b> | <b>50</b> | <b>63</b> | 37                | <b>79</b> | <b>151</b> | <b>178</b> | <b>11</b>     | <b>23</b> | <b>54</b> | <b>67</b> |
| APE            |          |           |           |           |          |           |           |           |           |           |           |           |                   |           |            |            |               |           |           |           |
| MRT [3]        | 20       | 37        | 63        | 72        | 15       | 28        | 52        | 62        | 21        | 41        | 73        | 84        | 41                | 77        | 124        | 140        | 16            | 31        | 57        | 67        |
| TBFormer [1]   | 10       | 24        | 48        | 57        | 8        | 19        | 41        | 51        | 11        | 26        | 51        | 63        | <b>25</b>         | 73        | 118        | 136        | 9             | 23        | 49        | 60        |
| SocialTGCN [2] | 14       | 26        | 45        | 53        | 11       | 21        | 38        | 46        | 15        | 27        | 49        | 58        | 36                | 69        | <b>117</b> | 134        | 14            | 26        | 48        | 56        |
| JRFormer [4]   | <b>6</b> | <b>17</b> | 40        | 50        | 7        | 18        | 46        | 58        | 13        | 32        | 63        | 75        | 26                | 72        | 144        | 163        | 7             | 21        | 48        | 60        |
| Ours           | 9        | 19        | <b>39</b> | <b>47</b> | <b>7</b> | <b>14</b> | <b>31</b> | <b>39</b> | <b>10</b> | <b>21</b> | <b>44</b> | <b>55</b> | 32                | <b>67</b> | <b>117</b> | <b>133</b> | 9             | <b>19</b> | <b>44</b> | <b>54</b> |
| FDE            |          |           |           |           |          |           |           |           |           |           |           |           |                   |           |            |            |               |           |           |           |
| MRT [3]        | 17       | 32        | 57        | 68        | 15       | 29        | 52        | 62        | 22        | 44        | 82        | 96        | 36                | 68        | <b>122</b> | 144        | 20            | 40        | 78        | 96        |
| TBFormer [1]   | 20       | 32        | 56        | 66        | 18       | 28        | 48        | 58        | 20        | 39        | 78        | 93        | 30                | 68        | 134        | 158        | 16            | 27        | 53        | 66        |
| SocialTGCN [2] | 18       | 32        | 53        | 64        | 13       | 23        | 41        | 50        | 20        | 36        | 73        | 90        | 39                | 74        | 142        | 174        | 18            | 32        | 62        | 77        |
| JRFormer [4]   | <b>5</b> | <b>13</b> | 39        | 47        | <b>6</b> | 17        | 35        | 41        | 14        | 32        | 67        | 80        | <b>24</b>         | 71        | 181        | 212        | <b>5</b>      | 19        | <b>34</b> | 60        |
| Ours           | 8        | 17        | <b>35</b> | <b>45</b> | <b>6</b> | <b>13</b> | <b>28</b> | <b>35</b> | <b>10</b> | <b>23</b> | <b>54</b> | <b>68</b> | 29                | <b>63</b> | 124        | <b>142</b> | 9             | <b>16</b> | 46        | <b>55</b> |

**Table 2: Long-term prediction (0.56s ~ 1.0s) performance on MI-Motion dataset for 5 different scenes. Best results are shown in boldface.**

|                | Park      |           |            | Street    |           |           | Indoor    |            |            | Special Locations |            |            | Complex Crowd |            |            |
|----------------|-----------|-----------|------------|-----------|-----------|-----------|-----------|------------|------------|-------------------|------------|------------|---------------|------------|------------|
| Time(s)        | 0.56      | 0.72      | 1.0        | 0.56      | 0.72      | 1.0       | 0.56      | 0.72       | 1.0        | 0.56              | 0.72       | 1.0        | 0.56          | 0.72       | 1.0        |
| JPE            |           |           |            |           |           |           |           |            |            |                   |            |            |               |            |            |
| MRT [3]        | 107       | 124       | 149        | 113       | 130       | 151       | 119       | 132        | 147        | 225               | 250        | 289        | 140           | 170        | 220        |
| TBFormer [1]   | 96        | 114       | 141        | 96        | 111       | 131       | 108       | 129        | 154        | 236               | 269        | 312        | 104           | 125        | 158        |
| SocialTGCN [2] | 95        | 116       | 154        | 81        | 98        | 124       | 108       | 127        | 160        | 246               | 276        | 322        | 113           | 137        | 177        |
| JRFormer [4]   | 81        | 102       | 134        | 92        | 98        | 102       | 95        | 115        | <b>120</b> | 278               | 313        | 331        | 98            | 119        | 152        |
| Ours           | <b>72</b> | <b>90</b> | <b>121</b> | <b>65</b> | <b>77</b> | <b>92</b> | <b>85</b> | <b>102</b> | 125        | <b>212</b>        | <b>234</b> | <b>277</b> | <b>92</b>     | <b>114</b> | <b>151</b> |
| APE            |           |           |            |           |           |           |           |            |            |                   |            |            |               |            |            |
| MRT [3]        | 85        | 92        | 103        | 78        | 84        | 84        | 97        | 102        | 105        | 154               | 159        | 171        | 82            | 94         | 110        |
| TBFormer [1]   | 71        | 81        | 94         | 66        | 74        | 74        | 81        | 95         | 105        | 154               | 159        | 169        | 76            | 87         | 101        |
| SocialTGCN [2] | 66        | 76        | 93         | 58        | 66        | 76        | <b>73</b> | <b>83</b>  | <b>97</b>  | 154               | 161        | 174        | <b>70</b>     | 81         | <b>97</b>  |
| JRFormer [4]   | 65        | 78        | 94         | 75        | 80        | 75        | 80        | 90         | 98         | 179               | 180        | 172        | 81            | 96         | 116        |
| Ours           | <b>59</b> | <b>69</b> | <b>86</b>  | <b>52</b> | <b>61</b> | <b>67</b> | <b>73</b> | 84         | 101        | <b>152</b>        | <b>158</b> | <b>167</b> | <b>70</b>     | <b>80</b>  | <b>97</b>  |
| FDE            |           |           |            |           |           |           |           |            |            |                   |            |            |               |            |            |
| MRT [3]        | 88        | 108       | 142        | 80        | 98        | 127       | 121       | 143        | 169        | 181               | 215        | <b>262</b> | 131           | 162        | 216        |
| TBFormer [1]   | 86        | 106       | 136        | 75        | 91        | 117       | 119       | 143        | 174        | 208               | 251        | 294        | 90            | 111        | 149        |
| SocialTGCN [2] | 88        | 112       | 154        | 62        | 79        | 108       | 119       | 138        | 180        | 226               | 265        | 321        | 106           | 131        | 173        |
| JRFormer [4]   | 75        | 90        | 128        | 52        | <b>56</b> | 78        | 97        | <b>112</b> | <b>136</b> | 272               | 307        | 337        | 77            | 111        | <b>142</b> |
| Ours           | <b>68</b> | <b>85</b> | <b>122</b> | <b>49</b> | 60        | <b>71</b> | <b>93</b> | 114        | 140        | <b>179</b>        | <b>209</b> | 266        | <b>70</b>     | <b>95</b>  | <b>142</b> |

## B LONG-TERM PREDICTION RESULTS ON FOUR DIFFERENT DATASETS

Additionally, we test at multiple time points on the CMU\_Mocap, MuPoTs-3D, Mix1, and Mix2 datasets, using 15 frames (1.0s) as input and predicting the output of 45 frames (3.0s). Table 3 shows the experimental results of our model and other methods at 1.0s-3.0s, and it can be seen that our method is generally superior to others in the three metrics JPE, APE, and FDE. To further demonstrate the effectiveness of our model in longer-term predictions, we predict sequences in the 3.0s ~ 4.0s time interval and combine the prediction effects from 1.0s ~ 3.0s into a line graph. As shown in Figure 1, our method has achieved advanced results in long-term predictions.

**Table 3: The long-term prediction results of JPE, APE and FDE on the datasets CMU-Mocap, MuPoTS-3D, Mix1, and Mix2. We compare our method with the previous SOTA methods in 1.0 ~ 3.0 second. Best results are shown in boldface.**

|         |                | CMU-Mocap (3 persons) |            |            |            | MuPoTS-3D (2-3 persons) |            |            |            | Mix1 (6 persons) |            |            |            | Mix2 (10 persons) |            |            |            |
|---------|----------------|-----------------------|------------|------------|------------|-------------------------|------------|------------|------------|------------------|------------|------------|------------|-------------------|------------|------------|------------|
| Time(s) |                | 1.0                   | 2.0        | 3.0        | Average    | 1.0                     | 2.0        | 3.0        | Average    | 1.0              | 2.0        | 3.0        | Average    | 1.0               | 2.0        | 3.0        | Average    |
| JPE     | MRT [3]        | 148                   | 256        | 352        | 252        | 194                     | 332        | 436        | 321        | 124              | 254        | 398        | 259        | 139               | 294        | 454        | 296        |
|         | TBFormer [1]   | 118                   | 225        | 329        | 224        | 189                     | 321        | 432        | 314        | 117              | 242        | 374        | 244        | 116               | 232        | 346        | 231        |
|         | SocialTGCN [2] | 102                   | 205        | 310        | 206        | 229                     | 374        | 523        | 375        | 109              | <b>232</b> | 376        | 239        | 112               | 226        | 341        | 226        |
|         | JRFormer [4]   | 122                   | 218        | 305        | 215        | 196                     | 334        | 430        | 320        | 110              | 248        | 380        | 246        | 106               | 220        | 336        | 221        |
|         | Ours           | <b>98</b>             | <b>198</b> | <b>299</b> | <b>198</b> | <b>175</b>              | <b>305</b> | <b>415</b> | <b>298</b> | <b>106</b>       | <b>232</b> | <b>372</b> | <b>237</b> | <b>104</b>        | <b>215</b> | <b>330</b> | <b>216</b> |
| APE     | MRT [3]        | 130                   | 187        | 218        | 178        | 135                     | 195        | 216        | 182        | 86               | 123        | 144        | 118        | 97                | 142        | 161        | 133        |
|         | TBFormer [1]   | 89                    | 132        | 152        | 124        | 131                     | 181        | 207        | 173        | 78               | <b>118</b> | 140        | 112        | 87                | 131        | 152        | 123        |
|         | SocialTGCN [2] | 84                    | 129        | 158        | 124        | 182                     | 266        | 398        | 282        | 84               | 131        | 163        | 126        | 95                | 148        | 181        | 141        |
|         | JRFormer [4]   | 97                    | 145        | 169        | 137        | 170                     | 221        | 245        | 212        | 84               | 121        | 145        | 117        | 81                | 131        | <b>145</b> | 119        |
|         | Ours           | <b>79</b>             | <b>122</b> | <b>145</b> | <b>115</b> | <b>129</b>              | <b>176</b> | <b>204</b> | <b>170</b> | <b>77</b>        | <b>118</b> | <b>139</b> | <b>111</b> | <b>79</b>         | <b>126</b> | 149        | <b>118</b> |
| FDE     | MRT [3]        | 109                   | 216        | 315        | 213        | 154                     | 282        | 378        | 271        | 86               | 209        | 353        | 216        | 95                | 241        | 402        | 246        |
|         | TBFormer [1]   | 78                    | 172        | 273        | 174        | 148                     | 272        | 379        | 266        | 85               | 199        | 330        | 205        | 79                | 182        | 295        | 185        |
|         | SocialTGCN [2] | 66                    | 153        | 247        | 155        | 201                     | 365        | 573        | 380        | 82               | 195        | <b>327</b> | 201        | 79                | 180        | 289        | 183        |
|         | JRFormer [4]   | 82                    | 158        | 249        | 156        | 154                     | 299        | 385        | 279        | 103              | 244        | 411        | 253        | <b>68</b>         | <b>164</b> | 282        | <b>171</b> |
|         | Ours           | <b>62</b>             | <b>148</b> | <b>244</b> | <b>151</b> | <b>132</b>              | <b>253</b> | <b>358</b> | <b>248</b> | <b>75</b>        | <b>190</b> | <b>327</b> | <b>197</b> | <b>68</b>         | 167        | <b>279</b> | <b>171</b> |

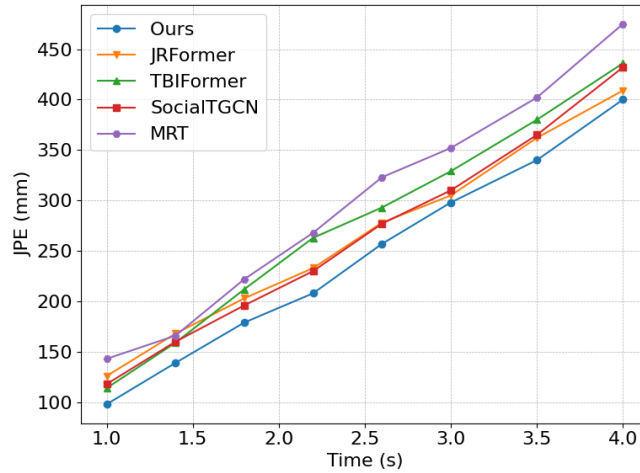

**Figure 1: Comparison of different methods for multi-person motion prediction over the time span of 1.0s ~ 4.0s.**

## REFERENCES

- [1] Xiaogang Peng, Siyuan Mao, and Zizhao Wu. 2023. Trajectory-aware body interaction transformer for multi-person pose forecasting. In *Proceedings of the IEEE/CVF Conference on Computer Vision and Pattern Recognition*. 17121–17130.
- [2] Xiaogang Peng, Xiao Zhou, Yikai Luo, Hao Wen, Yu Ding, and Zizhao Wu. 2023. The MI-Motion Dataset and Benchmark for 3D Multi-Person Motion Prediction. *arXiv preprint arXiv:2306.13566* (2023).
- [3] Jiashun Wang, Huazhe Xu, Medhini Narasimhan, and Xiaolong Wang. 2021. Multi-person 3d motion prediction with multi-range transformers. *Advances in Neural Information Processing Systems* 34 (2021), 6036–6049.
- [4] Qingyao Xu, Weibo Mao, Jingze Gong, Chenxin Xu, Siheng Chen, Weidi Xie, Ya Zhang, and Yanfeng Wang. 2023. Joint-Relation Transformer for Multi-Person Motion Prediction. In *Proceedings of the IEEE/CVF International Conference on Computer Vision*. 9816–9826.
